# Supplementary material for: Vitamin D3 Stimulates Proliferation Capacity, Expression of Pluripotency Markers, and Osteogenesis of Human Bone Marrow Mesenchymal Stromal/Stem Cells, Partly through SIRT1 Signaling
Source: MDPI journal article supplement (doi:10.3390/biom12020323), 2022-02-18
Supplement: s1 [file s1]

## SUPPLEMENTARY FIGURES AND FIGURE LEGENDS

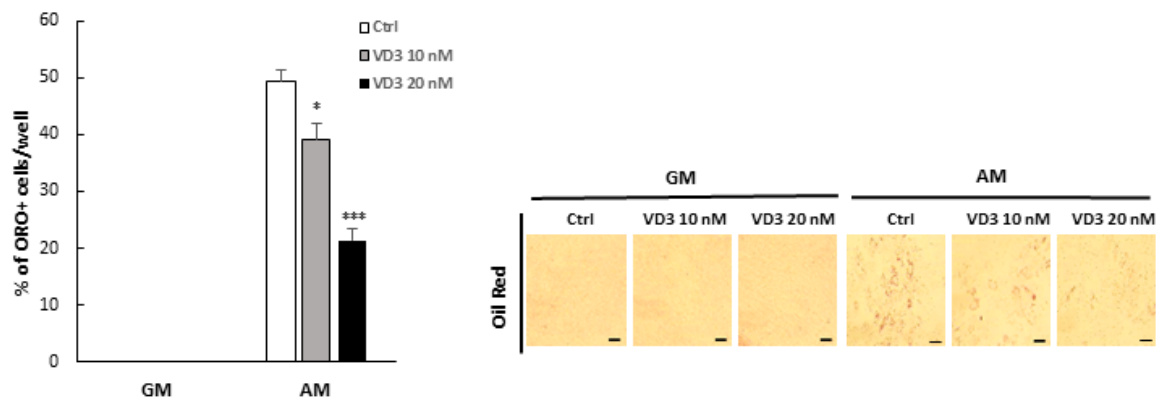

**Figure S1.** VD3 modulates adipogenic differentiation of BM-MSCs. Adipogenesis of BM-MSCs was analyzed for cells grown in GM or adipogenic medium (AM) with or without VD3 (10nM or 20nM). After 28 days intracellular lipid droplets were detected by Oil Red O staining. Representative images are shown (Scale bars: 20µm). Graph illustrates quantitative analysis showing Oil Red O positive (ORO+) cells percentage enumerated per visual field. Results are presented as means  $\pm$  SEM for at least three independent experiments. Statistically significant differences by t test: \* $p < 0.05$ ; \*\*\* $p < 0.001$  compared to untreated AM control.

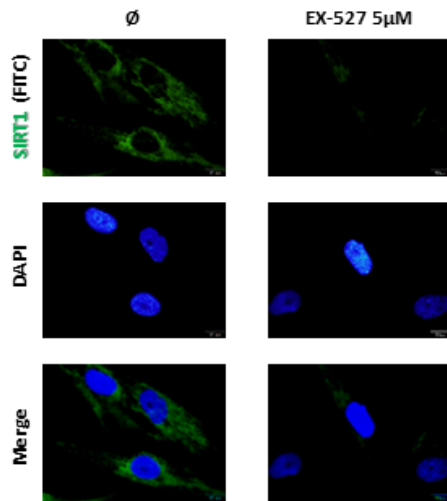

**Figure S2.** EX-527 inhibits SIRT1 expression in BM-MSCs. BM-MSCs were treated with or without EX-527 (5µM) during 5 days under standard cultivation conditions in GM. Protein expression of SIRT1 following the treatment detected by indirect immunofluorescence staining. Secondary fluorescein isothiocyanate (FITC)-conjugated antibodies were used for labeling corresponding primary antibodies. DNA was stained with 4',6-diamidino-2-phenylindole (DAPI). Representative images from two independent experiments are shown (Scale bars: 20µM).

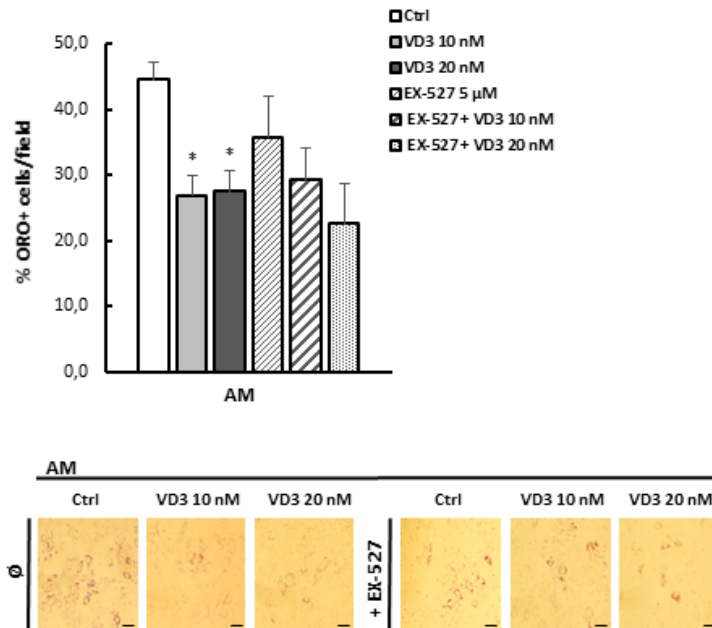

**Figure S3.** Reduced adipogenic differentiation of VD3-pretreated BM-MSCs: role of SIRT1 signaling. BM-MSCs were pretreated for 5 days with VD3 (10nM or 20nM), EX-527 (5 $\mu$ M) or both in GM. Afterwards, cells were cultured in AM for appropriate period to induce adipogenesis. Intracellular lipid droplets were detected after 28 days cultivation in AM by Oil Red O staining. Representative images are shown (Scale bars: 20 $\mu$ m). Graphs represent quantitative analysis of Oil Red O positive (ORO+) cells percentage enumerated per visual field. Results are presented as means  $\pm$  SEM for at least three independent experiments. Statistically significant differences by t test: \* $p < 0.05$  compared to untreated AM control.
